# Supplementary material
Source: bioRxiv or medRxiv preprint supplement (https://www.biorxiv.org/highwire/filestream/117399/field_highwire_adjunct_files/0/386656-1.pdf)
Supplement: Supplementary file [file 386656-1.pdf]

## Supplementary Information

### Pseudogenes in the mouse lineage: transcriptional activity and strain-specific history

Cristina Sisu<sup>\*1,2,3</sup>, Paul Muir<sup>\*4,5</sup>, Adam Frankish<sup>6</sup>, Ian Fiddes<sup>7</sup>, Mark Diekhans<sup>7</sup>, David Thybert<sup>6,8</sup>, Duncan T. Odom<sup>9,10</sup>, Paul Flicek<sup>6,10</sup>, Thomas Keane<sup>6</sup>, Tim Hubbard<sup>11</sup>, Jennifer Harrow<sup>12</sup>, Mark Gerstein<sup>1,2,13</sup>

## FIGURES

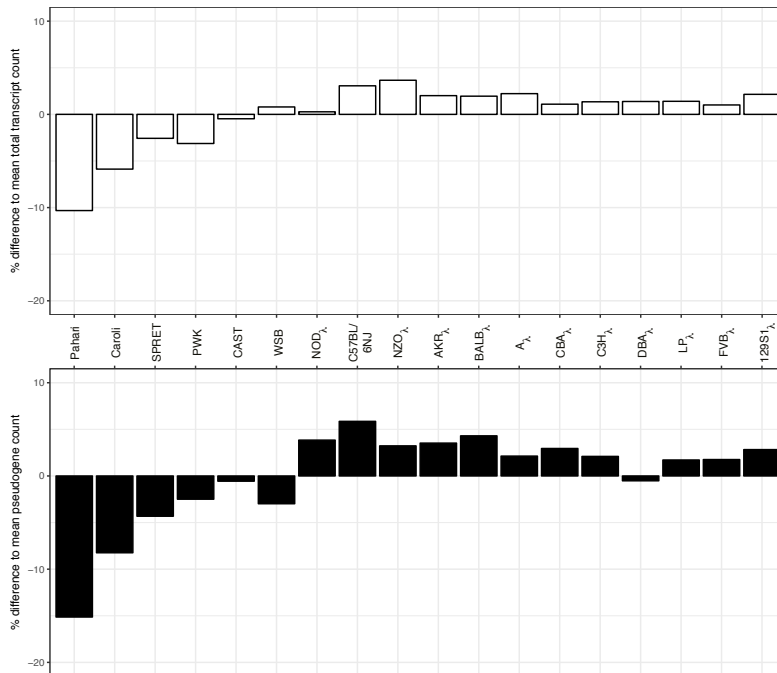

**Fig SF1. A** – The percentage difference between the number of pseudogene/conserved protein coding transcripts per strain and the average across all strains.

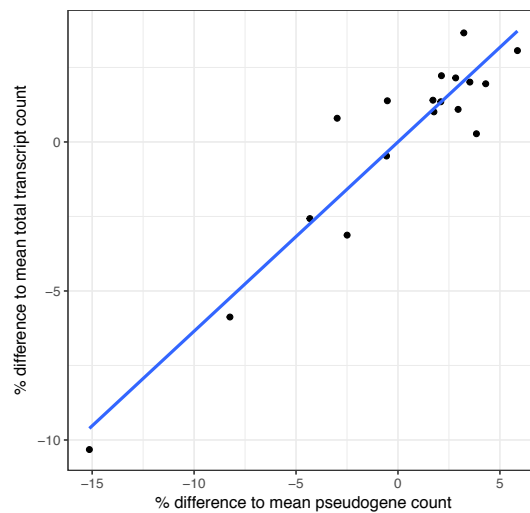

**Fig SF1. B** – Scatterplot of the percentage difference between the number of pseudogene/conserved protein coding transcripts per strain and the average across all strains. Pearson correlation coefficient = 0.94.

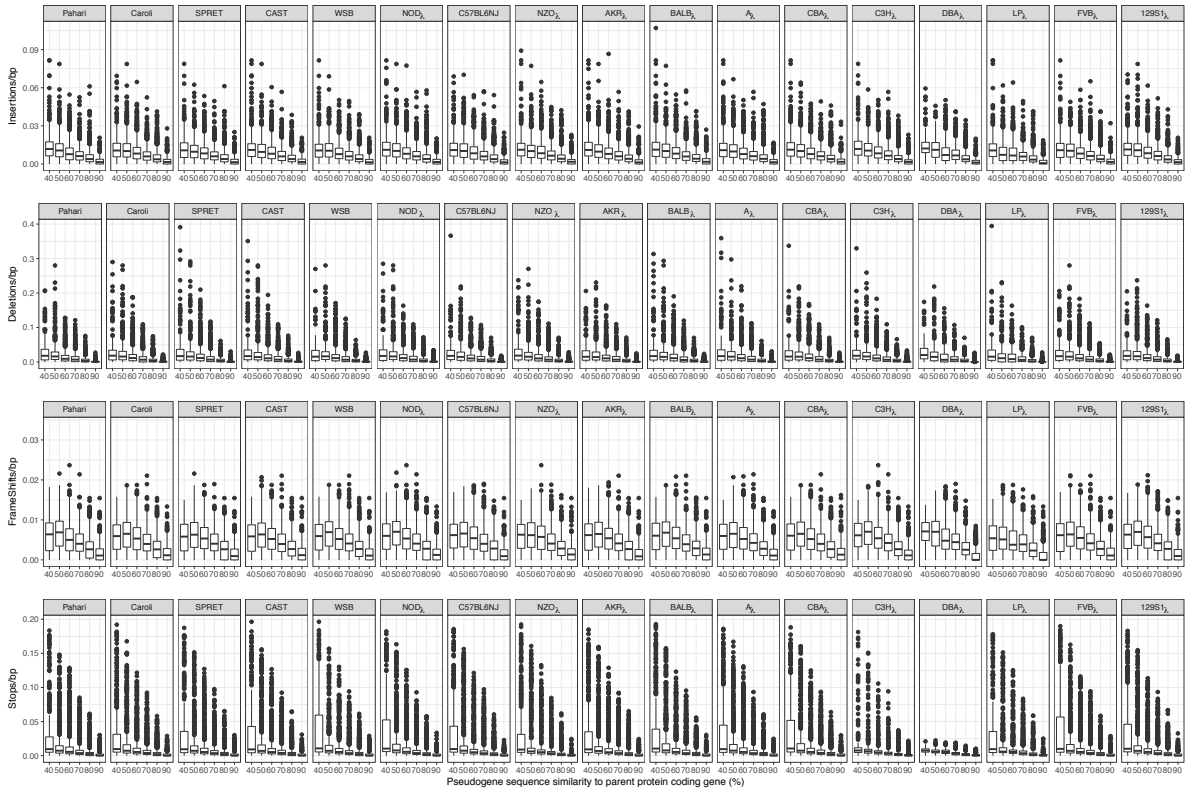

**Fig SF2. A** – Box plot distribution of pseudogene disablements per bp in 18 mouse strains.

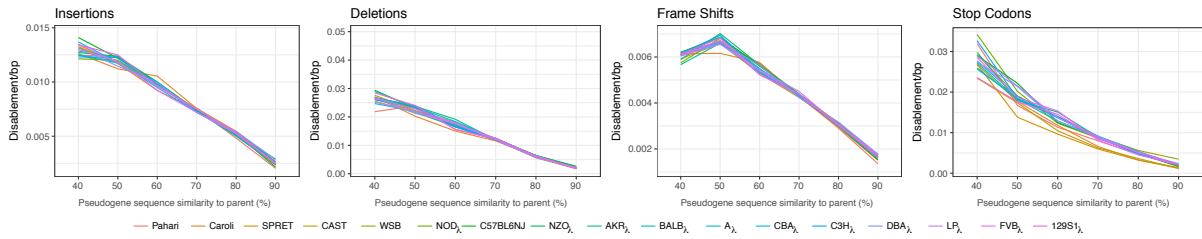

**Fig SF2. B** – Trends of disablement density per bp as function pseudogene sequence similarity to the parent in 18 mouse strains.

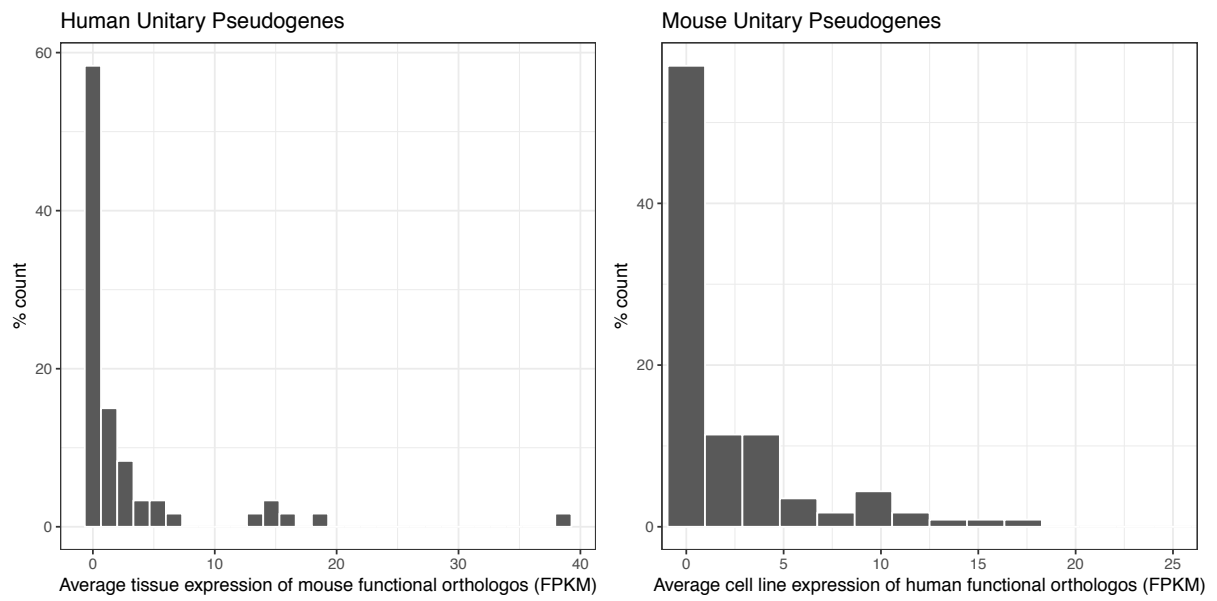

**Fig SF3. A** – Distribution of expression levels for the functional paralogs of unitary pseudogenes. The left hand graph gives the average tissue expression level for the mouse functional paralogs that are pseudogenised in human, while the right hand graph show the average ENCODE cell line expression level for the human functional paralogs that are unitary pseudogenes in mouse.

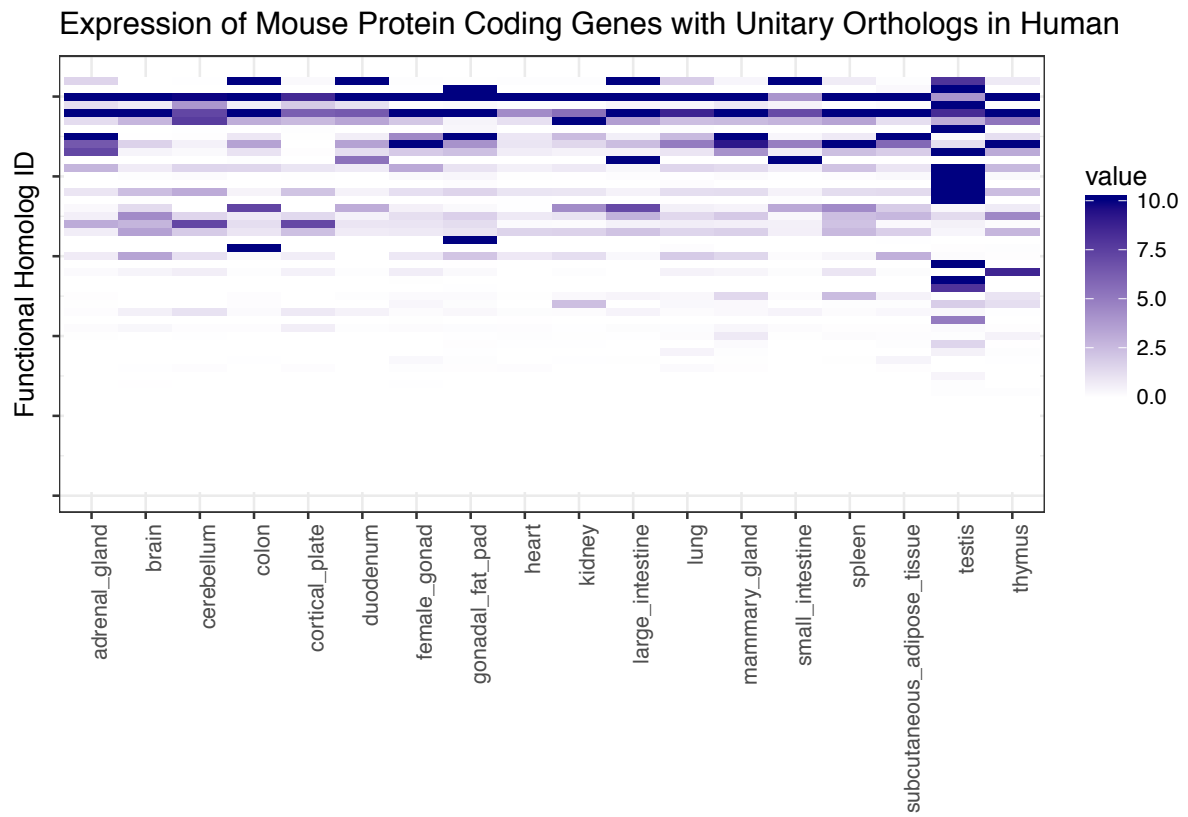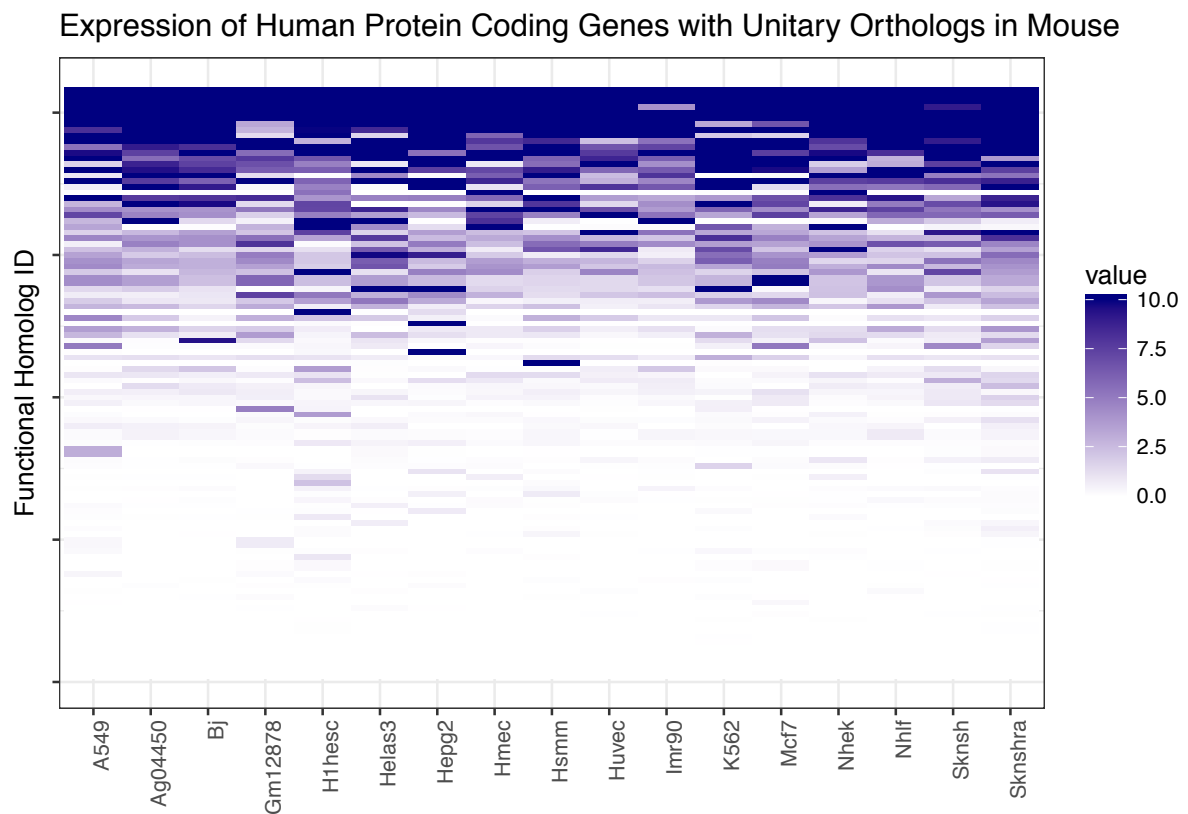

**Fig SF3. B** – Distribution of expression levels for the functional paralogs of unitary pseudogenes per tissue in mouse (top) and per ENCODE cell line in human(bottom). The colour scale top value corresponds to an expression score of greater or equal to 10FPKM.



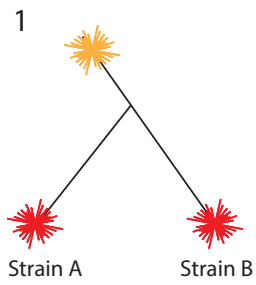

Pseudogenisation event occurred prior to the speciation and the pseudogene is found in the subsequent strains. The age of pseudogene is approximated at the time of strain divergence.

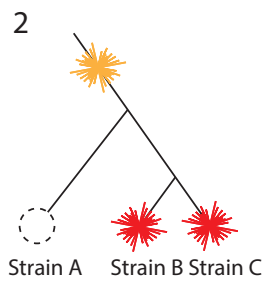

Pseudogenisation event occurred prior to the speciation but the pseudogene has been lost in one of the subsequent strains. Thus, the age of the pseudogene will be under-estimated.

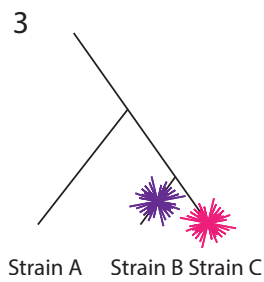

Pseudogenisation event occurred independently in multiple strains. Potentially the age of the pseudogene will be over-estimated.

**Fig SF3. C1** – Bias inducing events in estimating the age of pseudogene based on its presence or absence in various strains.

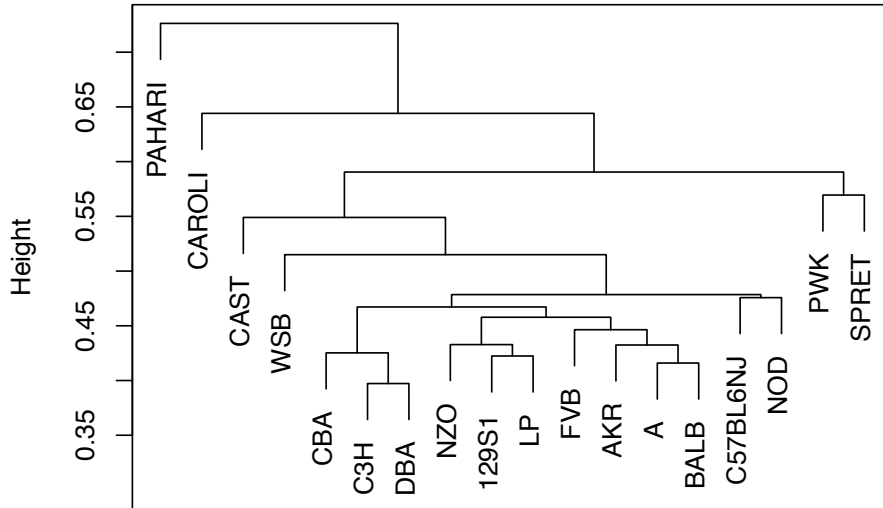

**Fig SF3. C2** – Mouse lineage evolutionary tree based on the presence and absence of orthologous and strain specific pseudogenes across the strains using as input a binary matrix (1-pseudogene is present and 0 –the pseudogene is absent from the strain).

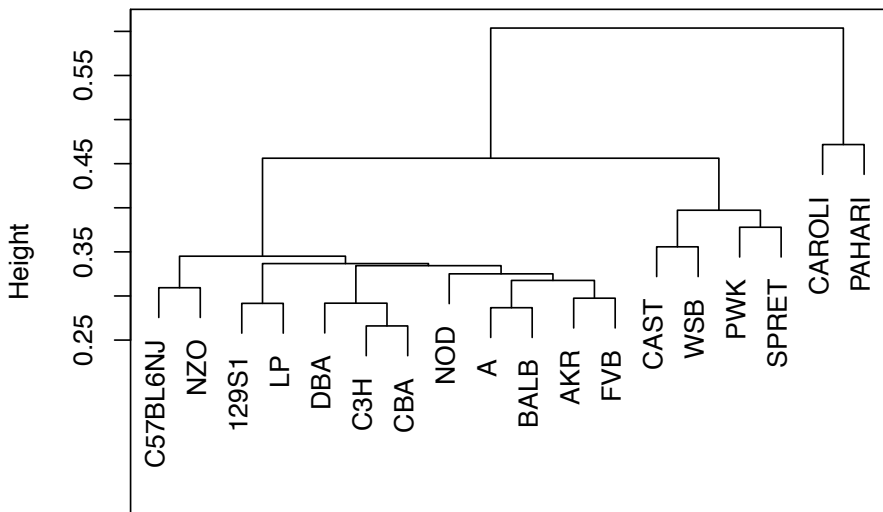

**Fig SF3. C3** – Mouse lineage evolutionary tree based solely on the presence and absence of orthologous pseudogenes across the strains using as input a binary matrix (1-pseudogene is present and 0 –the pseudogene is absent from the strain).

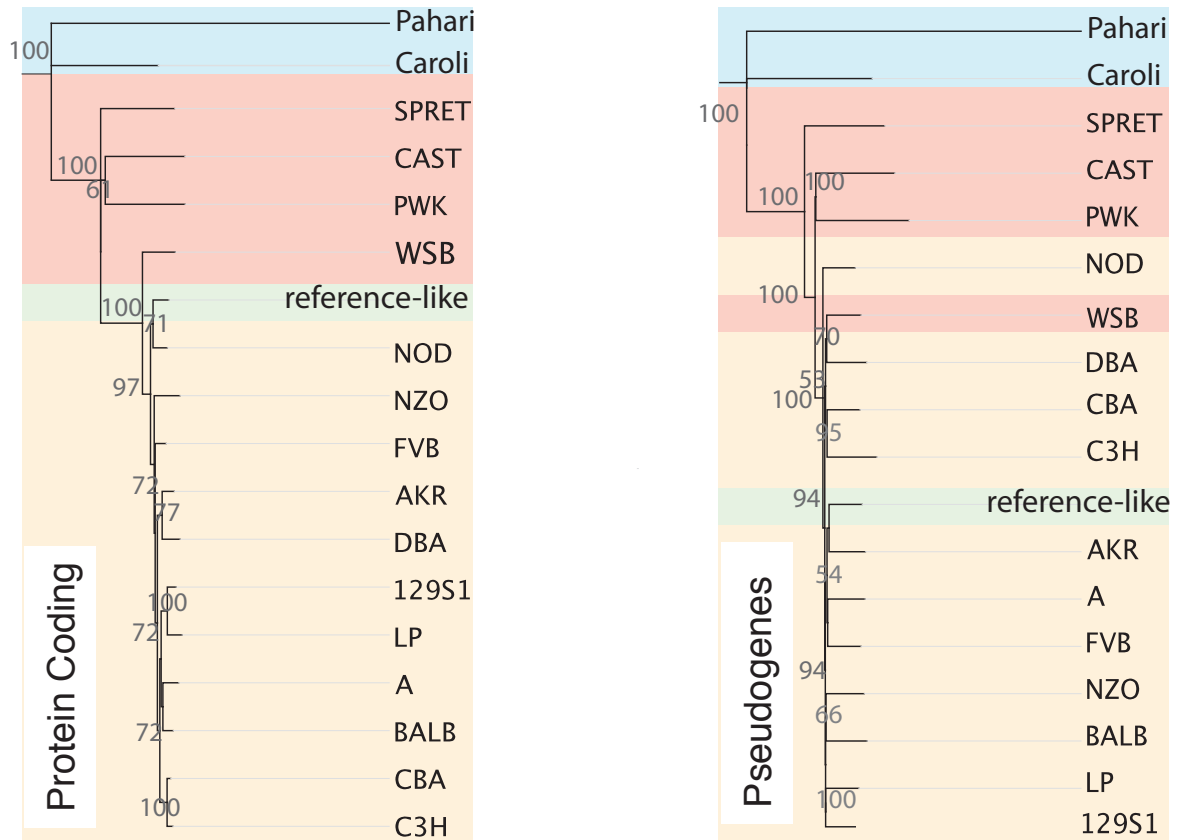

**Fig SF3. D** – Mirror of Figure 3C highlighting the phylogenetic trees of evolutionary conserved pseudogenes and pseudogenes parents with the associated bootstrap values on the branches.

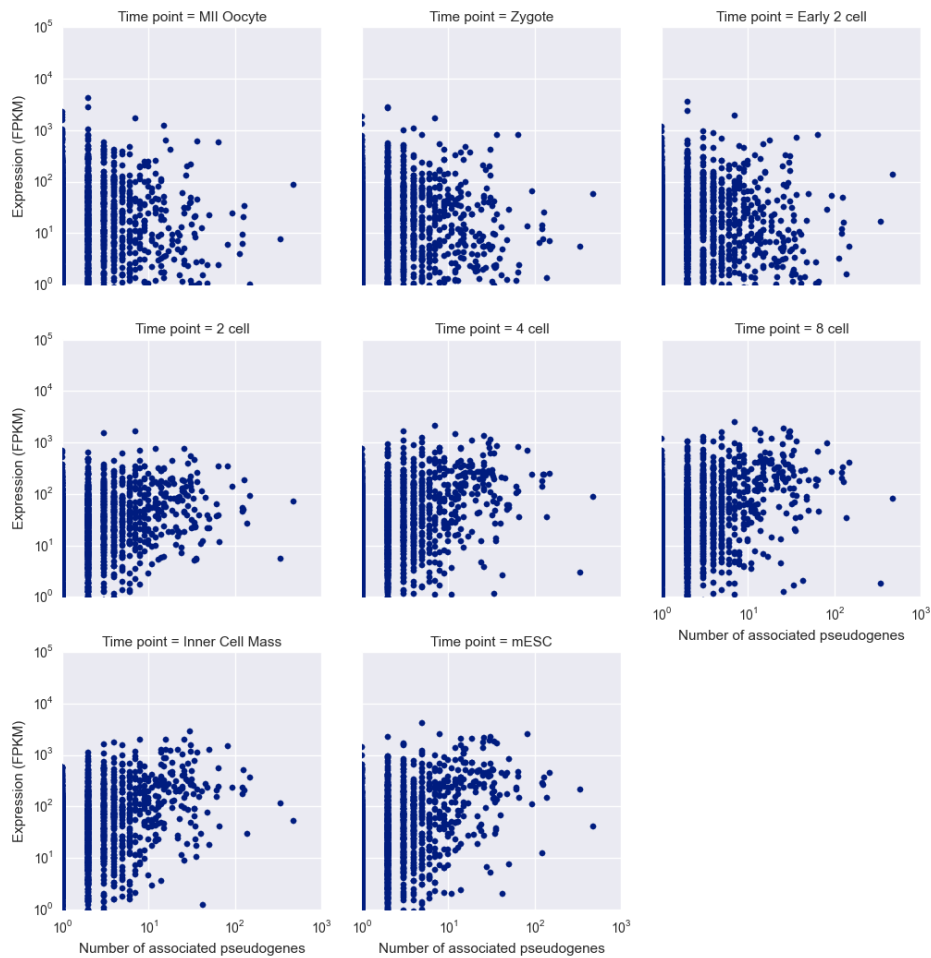

**Fig SF4. A.** Transcriptional activity of a gene vs the number of its associated pseudogenes at different early embryonic developmental time points.

| All Genes (7,797) |          |                |          | Parent Genes (1,015) |          |                |          |
|-------------------|----------|----------------|----------|----------------------|----------|----------------|----------|
| Embryonic Stage   | Slope    | R <sup>2</sup> | P-Value  | Embryonic Stage      | Slope    | R <sup>2</sup> | P-Value  |
| MII_oocyte        | 0.000680 | .0004          | 0.0803   | MII_oocyte           | 0.000195 | 0.000          | 0.930    |
| zygote            | 0.003195 | 0.0027         | 4.72e-06 | zygote               | 0.003353 | 0.001          | 0.281    |
| early_2cell       | 0.003324 | .0029          | 2.30e-06 | early_2cell          | 0.002932 | 0.001          | 0.298    |
| 2cell             | 0.016201 | .0185          | 1.42e-33 | 2cell                | 0.011617 | 0.007          | 0.00634  |
| 4cell             | 0.013029 | .0267          | 7.37e-48 | 4cell                | 0.011475 | 0.015          | 8.63e-05 |
| 8cell             | 0.011471 | .0292          | 3.18e-52 | 8cell                | 0.010365 | 0.018          | 2.30e-05 |
| ICM               | 0.012790 | .0431          | 1.26e-76 | ICM                  | 0.016475 | 0.041          | 6.83e-11 |
| mESC              | 0.012985 | .0477          | 7.24e-85 | mESC                 | 0.015057 | 0.044          | 1.22e-11 |

**Fig SF4. B.** Regression statistics defining the transcriptional activity of a gene vs the number of its associated pseudogenes at different early embryonic developmental time points.

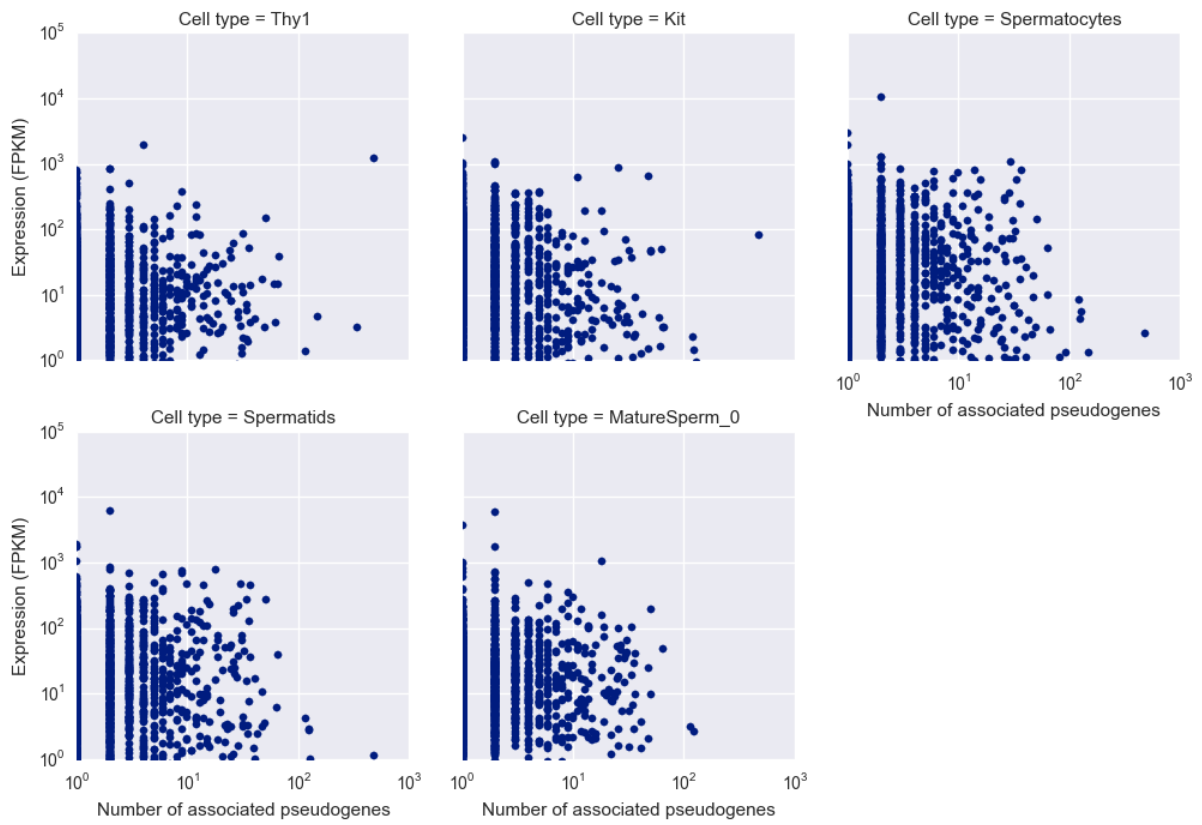

**Fig SF4. C.** Transcriptional activity of a gene vs the number of its associated pseudogenes during spermatogenesis.

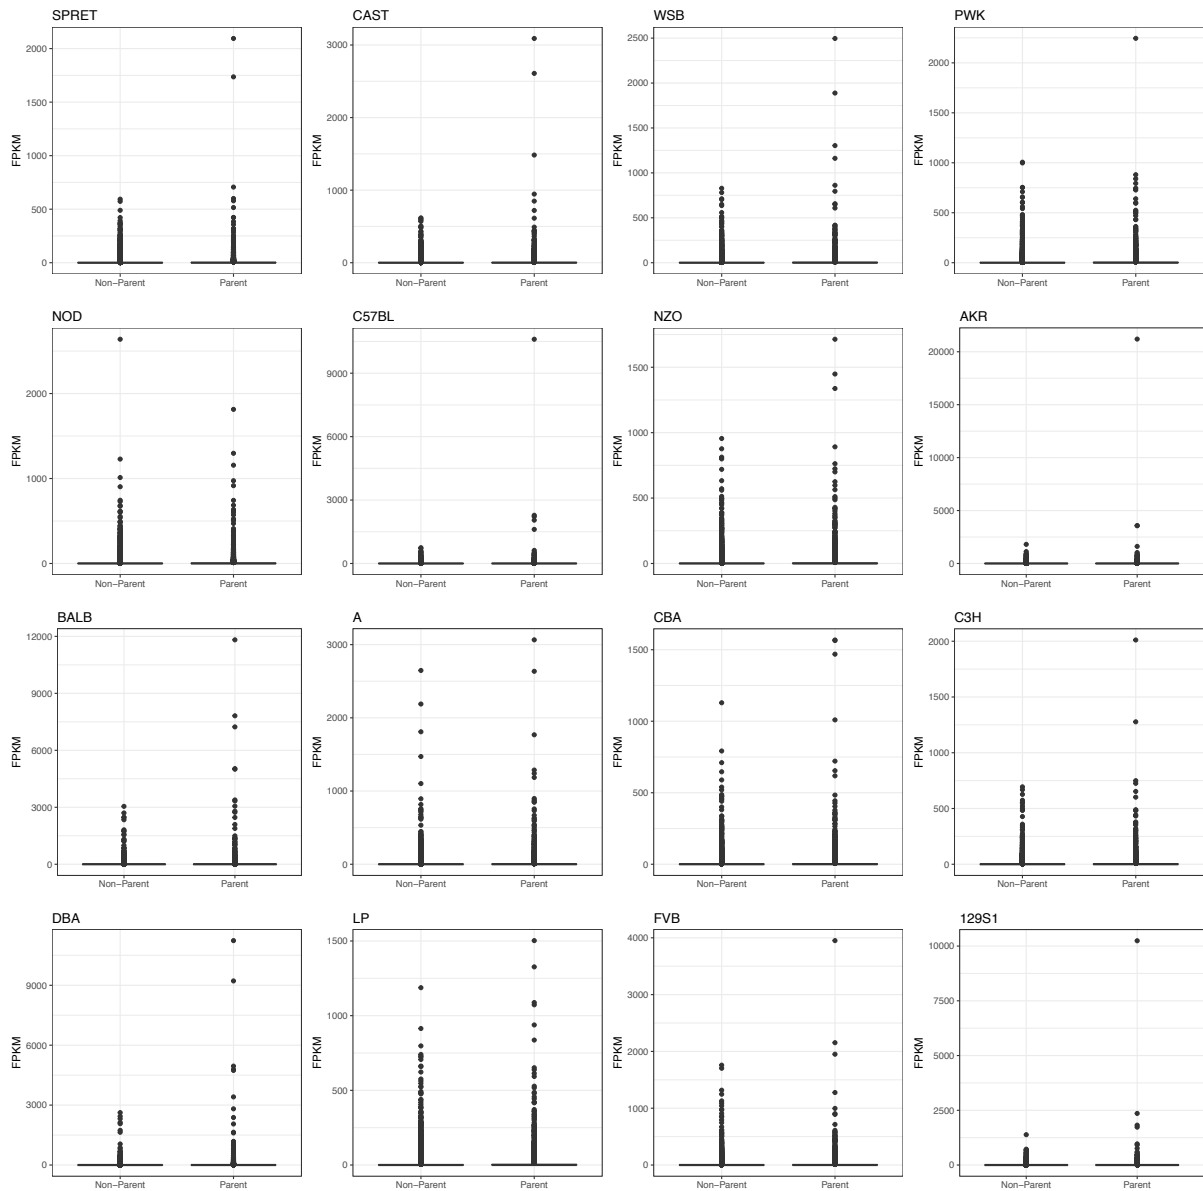

**Fig SF4. D** – Average expression levels in adult mouse brain for pseudogene parent and non-parent protein coding genes

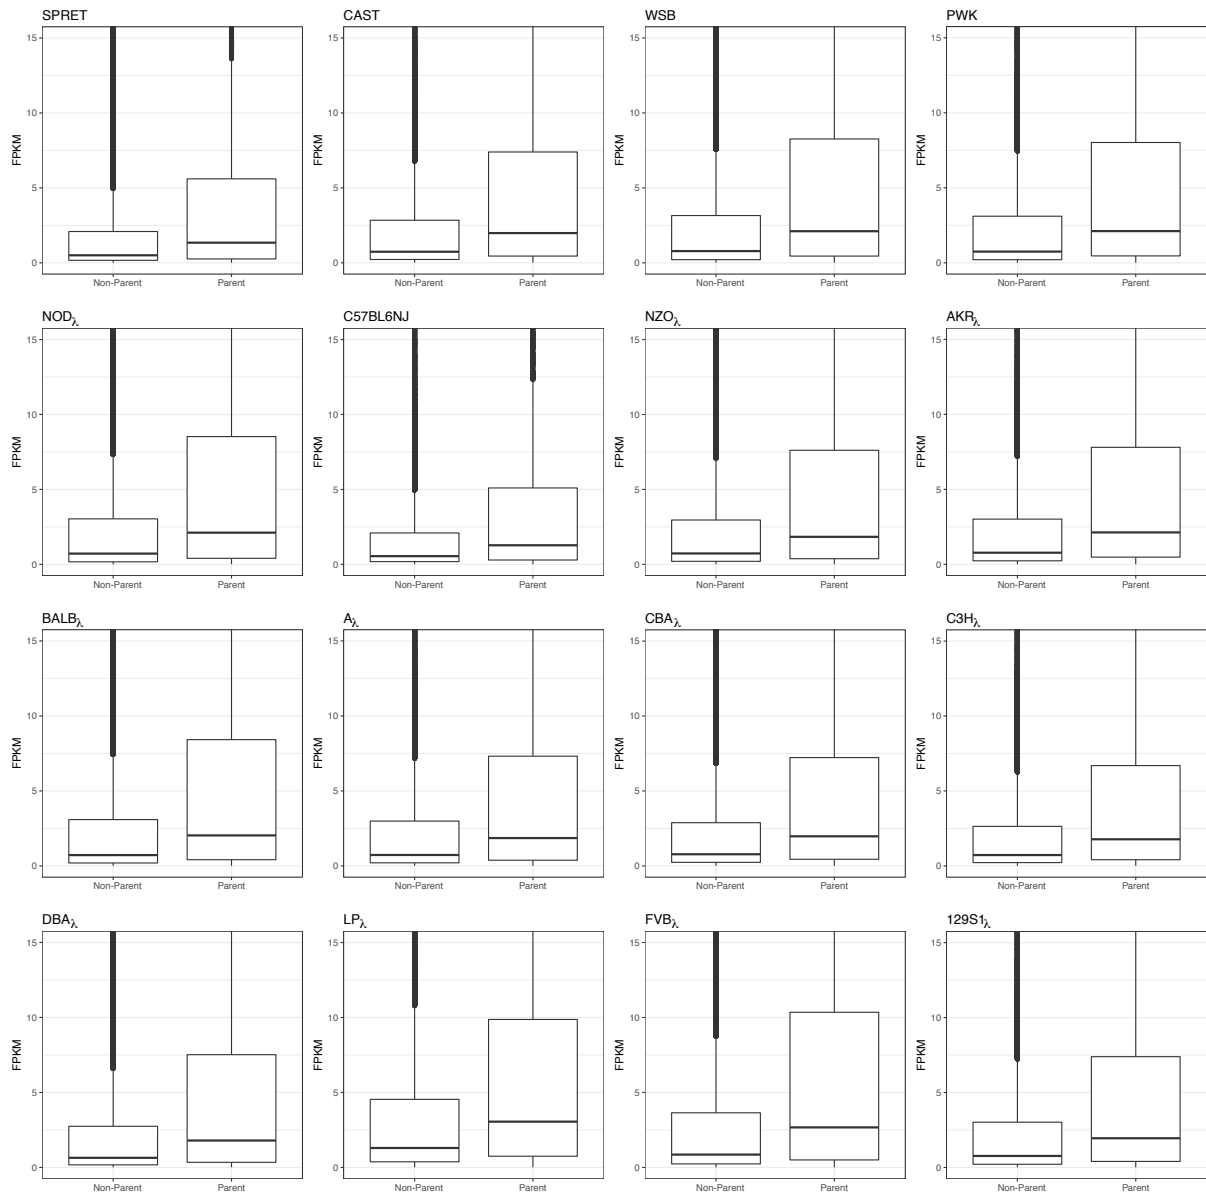

**Fig SF4. E** – zoom in: Average expression levels in adult mouse brain for pseudogene parent and non-parent protein coding genes.

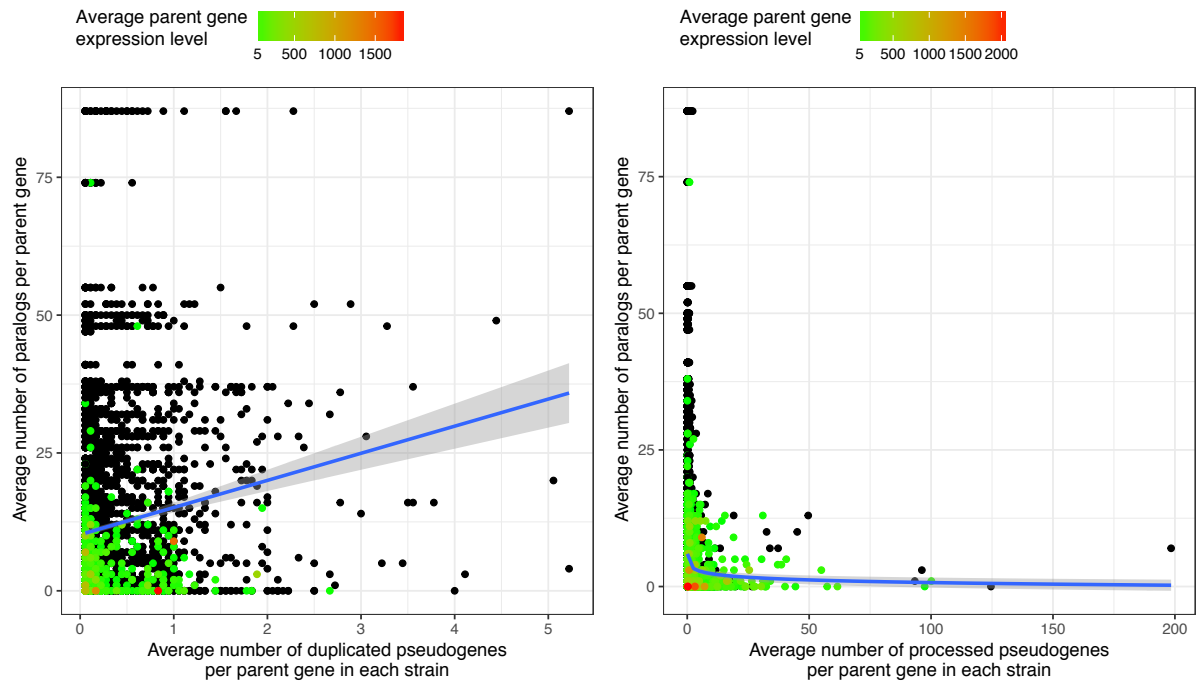

**Fig SF5. A** – Relationship between the number of pseudogenes and functional paralogs for a given parent gene (left – duplicated pseudogenes, right – processed pseudogenes). Fitting lines show a vague correlation between the number of functional vs disabled copies of a gene, with a linear fit for duplicated pseudogenes and a negative logarithmic fit for processed pseudogene. The gray area is the standard deviation. The dots are coloured by the average expression level of the parent gene in brain adult tissue in the range described in the heat scale above each figure. The black dots correspond to protein coding gene with an average expression level across the strains lower than 5 FPKM.



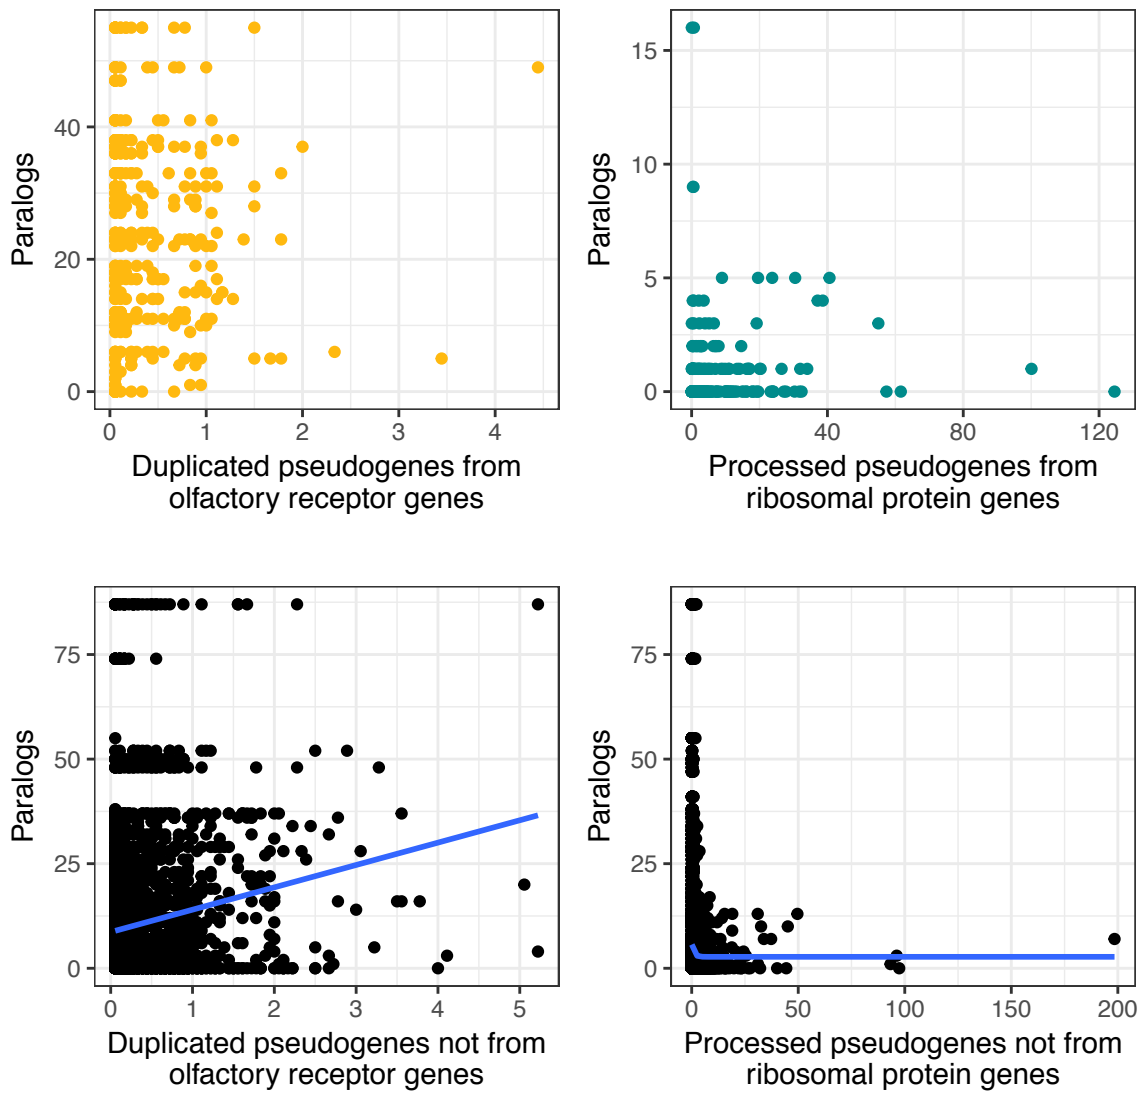

**Fig SF5. B** – Relationship between the number of pseudogenes and functional paralogs for a given parent gene (left – duplicated pseudogenes, right – processed pseudogenes) for olfactory receptors (OR) and ribosomal protein (RP) derived pseudogenes. The top left plot shows the distribution of OR pseudogenes vs paralogs of olfactory receptors per strain. Correspondingly, the top right plot shows the distribution of RP pseudogenes vs paralogs of ribosomal proteins per strain. The bottom plots show the distribution of the pseudogenes and paralogs that are not generated from olfactory receptor or ribosomal proteins. Correlation lines are drawn in blue.

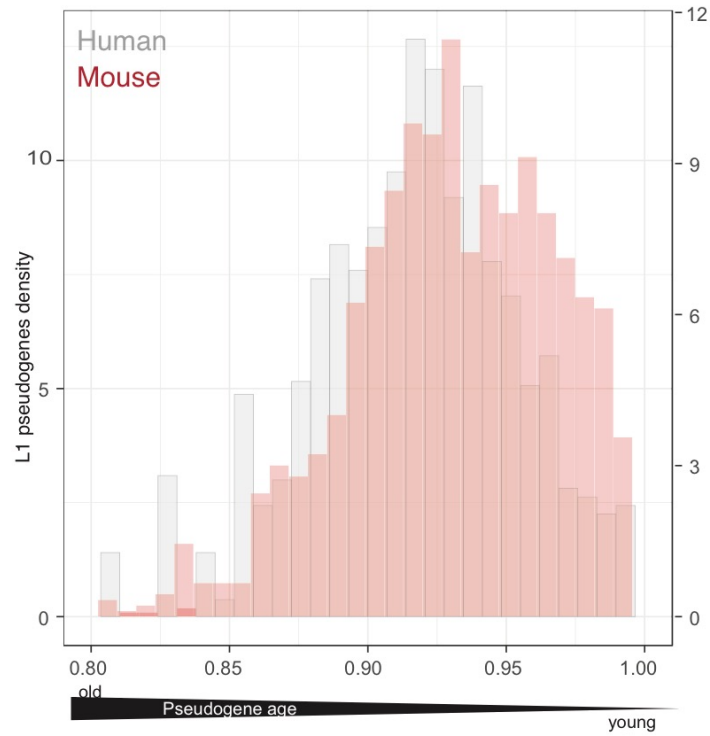

**Fig SF5. C** – Distribution of L1-flanked pseudogenes (y-axis) as function of age (x-axis). The pseudogene age is approximated as DNA sequence similarity to the parent gene.

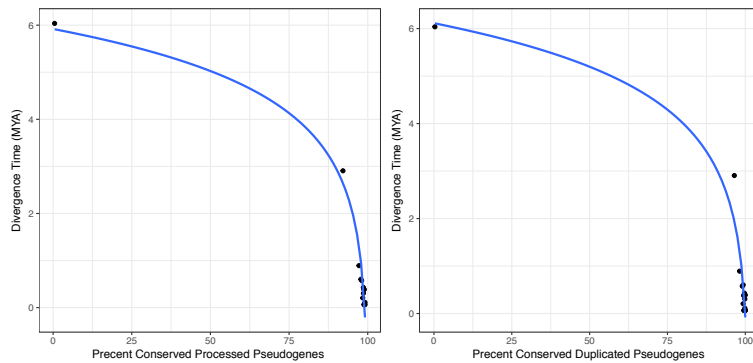

**Fig SF6.** Distribution of conserved pseudogenes as function of biotype and strain divergence. The “Misc” biotype includes unitary pseudogenes as well as pseudogene for which the biotype could not be accurately determined. All three pseudogene classes follow a logarithmic curve with respect to the strain divergence times, with the best fit being observed for processed pseudogenes.

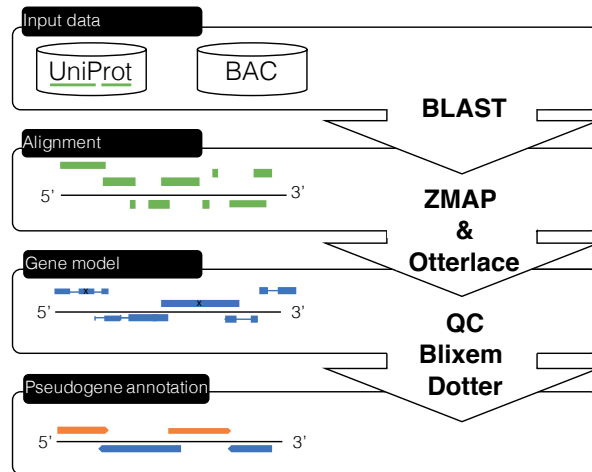

**Fig SF7.** Manual annotation curation workflow as previously described in [33, 34].

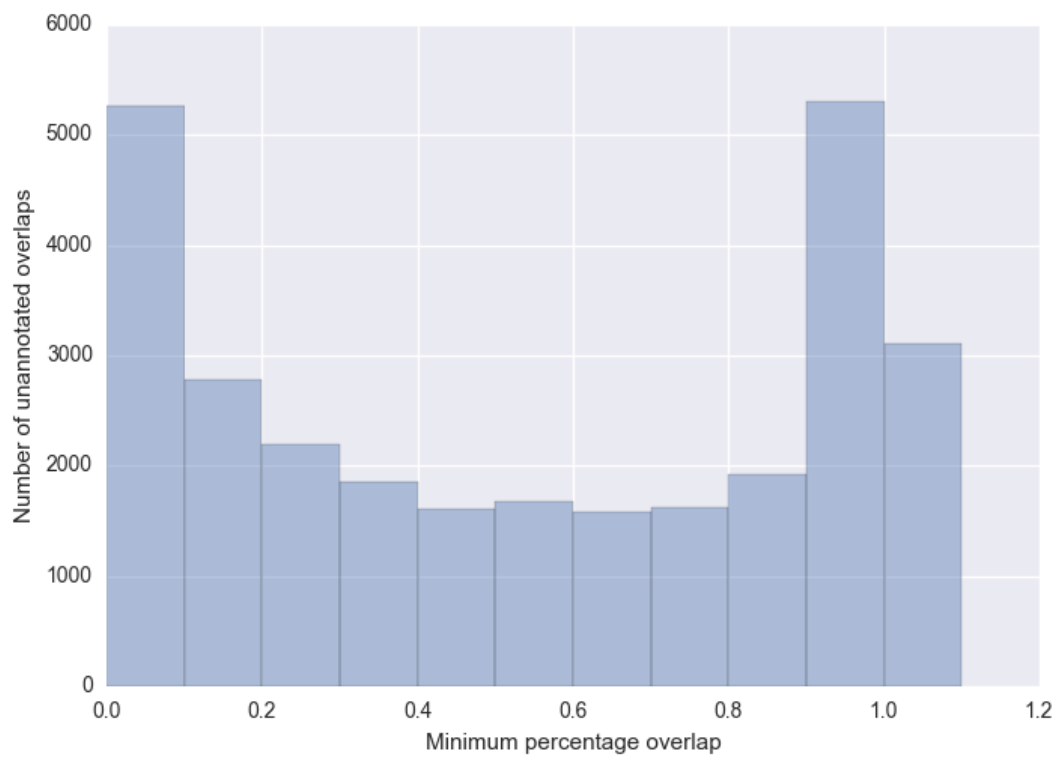

**Fig SF8.** Histogram of percentage overlap for lower of the reciprocal overlap cut-offs.

## Tables

**Table S1. A.** Reference genome pseudogene annotation in mouse and human.

| Organism | Manual curation (M) | PseudoPipe* (PP) | RetroFinder* (RF) | Union PP&RF | Intersection M&PP (%) |
|----------|---------------------|------------------|-------------------|-------------|-----------------------|
| Mouse    | 10,524              | 18,659           | 18,467            | 26,103      | 8,786 (83.5)          |
| Human    | 14,650              | 15,978           | 15,474            | 22,396      | 13,177 (89.9)         |

\*Chromosomal assembled DNA only

**Table S1. B.** Reference genome automatic pseudogene annotation in mouse and human.

|       | PseudoPipe (PP) |          |         | RetroFinder (RF) | PP-RF overlap |
|-------|-----------------|----------|---------|------------------|---------------|
|       | Autosomes       | Sex Chr. | Others* |                  |               |
| Mouse | 14,094          | 4,565    | 4,162   | 18,467           | 10,522        |
| Human | 14,638          | 1,341    | 2,054   | 15,474           | 9,057         |

\*Includes patches, scaffolds, and unassembled DNA.

**Table S1. C.** Human and mouse pseudogene annotation summary.

|                         | Human (v25)             | Mouse (M12)             |
|-------------------------|-------------------------|-------------------------|
| <b>Total GENCODE</b>    | <b>14,650</b>           | <b>10,524</b>           |
| processed pseudogenes   | 10,725                  | 7,486                   |
| unprocessed pseudogenes | 3,400                   | 2,625                   |
| unitary pseudogenes     | 214                     | 34                      |
| polymorphic pseudogenes | 51                      | 77                      |
| ambiguous pseudogenes   | 21                      | 99                      |
| <b>Total PseudoPipe</b> | <b>15,978 (+2,054*)</b> | <b>18,659 (+4,162*)</b> |
| processed pseudogenes   | 8,081 (+ 683*)          | 9,979 (+ 559*)          |
| unprocessed pseudogenes | 2,534 (+ 550*)          | 1,929 (+ 274*)          |
| ambiguous pseudogenes   | 5,363 (+ 821*)          | 6,751 (+3,329*)         |

\*Includes patches, scaffolds, and unassembled DNA.

**Table S2.** Mouse strains description and nomenclature.

| Strain ID          | Description                                  | Class                       |
|--------------------|----------------------------------------------|-----------------------------|
| Pahari             | PAHARI/EiJ – Mus Pahari                      | Wild-derived outgroup       |
| Caroli             | CAROLI/EiJ – Mus Caroli                      |                             |
| SPRET              | SPRET/EiJ – Mus Spretus                      | Wild-derived inbred strains |
| PWK                | PWK/PhJ – Mus Musculus Musculus              |                             |
| CAST               | CAST/EiJ – Mus Musculus Castaneus            |                             |
| WSB                | WSB/EiJ – Mus Musculus Domesticus            |                             |
| NOD <sub>λ</sub>   | NOD/ShiLtJ – Mus Musculus Non-obese Diabetic |                             |
| C57BL              | C57BL/6NJ – Mus Musculus Black 6N            | Laboratory inbred strains   |
| NZO <sub>λ</sub>   | NZO/HILtJ – Mus Musculus New Zealand Obese   |                             |
| AKR <sub>λ</sub>   | AKR/J – Mus Musculus                         |                             |
| BALB <sub>λ</sub>  | BALB/cJ – Mus Musculus                       |                             |
| A <sub>λ</sub>     | A/J – Mus Musculus                           |                             |
| CBA <sub>λ</sub>   | CBA/J – Mus Musculus                         |                             |
| C3H <sub>λ</sub>   | C3H/HeJ – Mus Musculus                       |                             |
| DBA <sub>λ</sub>   | DBA/2J – Mus Musculus                        |                             |
| LP <sub>λ</sub>    | LP/J – Mus Musculus                          |                             |
| FVB <sub>λ</sub>   | FVB/NJ – Mus Musculus                        |                             |
| 129S1 <sub>λ</sub> | 129S1/SvImJ – Mus Musculus                   |                             |

**Table S3A:** Estimation of the total number of pseudogenes according to PseudoPipe per strain.

| <b>Strain</b>      | <b>PseudoPipe predictions</b> | <b>Input protein coding transcripts conserved between mouse reference and strains</b> | <b>% Protein coding transcripts conserved</b> | <b>% Pseudogenes annotated with respect to the total number of pseudogenes in reference genome</b> | <b>Estimate of total number of pseudo-pipe pseudo-genes</b> |
|--------------------|-------------------------------|---------------------------------------------------------------------------------------|-----------------------------------------------|----------------------------------------------------------------------------------------------------|-------------------------------------------------------------|
| <b>Mouse</b>       | 18659                         | 56999                                                                                 | 100.00                                        | 100.00                                                                                             | <b>18659</b>                                                |
| <b>C57BL/6NJ</b>   | 14722                         | 47145                                                                                 | 82.71                                         | 79.27                                                                                              | <b>18659</b>                                                |
| PAHARI             | 12414                         | 41022                                                                                 | 71.97                                         | 68.97                                                                                              | <b>18082</b>                                                |
| CAROLI             | 13399                         | 43056                                                                                 | 75.54                                         | 72.39                                                                                              | <b>18595</b>                                                |
| SPRET              | 14170                         | 44567                                                                                 | 78.19                                         | 74.93                                                                                              | <b>18998</b>                                                |
| PWK                | 14485                         | 44313                                                                                 | 77.74                                         | 74.50                                                                                              | <b>19532</b>                                                |
| CAST               | 14427                         | 45527                                                                                 | 79.87                                         | 76.55                                                                                              | <b>18935</b>                                                |
| WSB                | 14202                         | 46107                                                                                 | 80.89                                         | 77.52                                                                                              | <b>18405</b>                                                |
| NOD <sub>λ</sub>   | 14965                         | 45869                                                                                 | 80.47                                         | 77.12                                                                                              | <b>19495</b>                                                |
| NZO <sub>λ</sub>   | 13909                         | 47417                                                                                 | 83.19                                         | 79.72                                                                                              | <b>17527</b>                                                |
| AKR <sub>λ</sub>   | 14380                         | 46662                                                                                 | 81.86                                         | 78.45                                                                                              | <b>18414</b>                                                |
| BALB <sub>λ</sub>  | 14393                         | 46636                                                                                 | 81.82                                         | 78.41                                                                                              | <b>18441</b>                                                |
| A <sub>λ</sub>     | 13823                         | 46760                                                                                 | 82.04                                         | 78.62                                                                                              | <b>17664</b>                                                |
| CBA <sub>λ</sub>   | 14479                         | 46243                                                                                 | 81.13                                         | 77.75                                                                                              | <b>18709</b>                                                |
| C3H <sub>λ</sub>   | 14400                         | 46360                                                                                 | 81.33                                         | 77.95                                                                                              | <b>18560</b>                                                |
| DBA <sub>λ</sub>   | 13872                         | 46375                                                                                 | 81.36                                         | 77.97                                                                                              | <b>17874</b>                                                |
| LP <sub>λ</sub>    | 13923                         | 46384                                                                                 | 81.38                                         | 77.99                                                                                              | <b>17936</b>                                                |
| FVB <sub>λ</sub>   | 14202                         | 46205                                                                                 | 81.06                                         | 77.69                                                                                              | <b>18366</b>                                                |
| 129S1 <sub>λ</sub> | 13820                         | 46726                                                                                 | 81.98                                         | 78.56                                                                                              | <b>17673</b>                                                |

**Table S3B:** Distribution of curated pseudogenes in each strain based on their confidence level.

| Strain             | Level 1 | Level 2 | Level 3 |
|--------------------|---------|---------|---------|
| <b>C57BL/6NJ</b>   | 5615    | 993     | 6597    |
| PAHARI             | 2971    | 1254    | 6361    |
| CAROLI             | 3860    | 1224    | 6362    |
| SPRET              | 4444    | 980     | 6511    |
| PWK                | 4630    | 865     | 6668    |
| CAST               | 4694    | 1003    | 6707    |
| WSB                | 4869    | 873     | 6360    |
| NOD <sub>λ</sub>   | 5285    | 937     | 6732    |
| NZO <sub>λ</sub>   | 5592    | 1048    | 6237    |
| AKR <sub>λ</sub>   | 5289    | 996     | 6629    |
| BALB <sub>λ</sub>  | 5344    | 939     | 6728    |
| A <sub>λ</sub>     | 5295    | 997     | 6448    |
| CBA <sub>λ</sub>   | 5231    | 898     | 6713    |
| C3H <sub>λ</sub>   | 5201    | 917     | 6618    |
| DBA <sub>λ</sub>   | 5282    | 908     | 6219    |
| LP <sub>λ</sub>    | 5199    | 1015    | 6474    |
| FVB <sub>λ</sub>   | 5257    | 977     | 6460    |
| 129S1 <sub>λ</sub> | 5284    | 1042    | 6501    |

**Table S4.** Unitary pseudogenes in human and mouse. (see SupTable\_S4\_Unitary.xlsx available at <http://mouse.pseudogene.org/Supplement/> )**Table S5.** Pseudogene family and clan characterization. (see SupTable\_S5\_Family.xlsx available at <http://mouse.pseudogene.org/Supplement/> )**Table S6.** Unitary pseudogenes in mouse strains. (see SupTable\_S6\_StarinsUnitary.xlsx available at <http://mouse.pseudogene.org/Supplement/> )**Table S7. A.** Enrichment of pseudogene parent gene class in essential genes.

| Pseudogenes | Genes      | Essential | Nonessential | Odds Ratio | p-Value               |
|-------------|------------|-----------|--------------|------------|-----------------------|
| Total       | Parent     | 1162      | 1061         | 1.93       | 7.7*10 <sup>-39</sup> |
|             | Non-Parent | 2050      | 3620         |            |                       |
| Processed   | Parent     | 1034      | 869          | 2.08       | 2.3*10 <sup>-43</sup> |
|             | Non-Parent | 2178      | 3812         |            |                       |
| Duplicated  | Parent     | 334       | 349          | 1.44       | 6.0*10 <sup>-6</sup>  |
|             | Non-Parent | 2878      | 4332         |            |                       |

**Table S7. B.** Correlations between gene essentiality and parent gene status controlling for transcription level.

|                   | Linear Prob. Model | Probit             | Probit Marginal Effect |
|-------------------|--------------------|--------------------|------------------------|
| Parent gene (Y/N) | 0.2035<br>(0.0168) | 0.5108<br>(0.0441) | 0.1943<br>(0.016)      |
| Transcription     | 0.0003<br>(0.0001) | 0.0010<br>(0.0002) | 0.0004<br>(8.11e-05)   |

Marginal effect for probit (column 3) calculated at mean values for each independent variable. Number of observation: 7797. Standard errors are given in parentheses. Parent gene (Y/N) is a binary categorical variable that is equal to 1 if a gene has any associated pseudogenes and 0 if not.

**Table S8.** Encode transcription data. (see SupTable\_S8\_EncodeTranscription.xlsx available at <http://mouse.pseudogene.org/Supplement/> )
